# Supplementary material for: Filament Condition-Specific Response Elements Control the Expression of NRG1 and UME6, Key Transcriptional Regulators of Morphology and Virulence in Candida albicans
Source: PubMed Central journal article supplement (PMC4374957; doi:10.1371/journal.pone.0122775), 2015-03-26
Supplement: pone.0122775.s001.pdf [file pone.0122775.s001.pdf]

**Table S1.****Strains used in this study**

| Strain                                        | Genotype                                                                                                                                  | Source     |
|-----------------------------------------------|-------------------------------------------------------------------------------------------------------------------------------------------|------------|
| SC5314                                        | Prototroph                                                                                                                                | (1)        |
| CAI4                                          | <i>ura3Δ::imm<sup>434</sup>/ura3Δ::imm<sup>434</sup> iro1Δ::imm<sup>434</sup>/<br/>iro1Δ::imm<sup>434</sup></i>                           | (2)        |
| DT425 ( <i>UME67 kb UR<sub>r</sub>-lacZ</i> ) | <i>ura3Δ::imm<sup>434</sup>/ura3Δ::imm<sup>434</sup> iro1Δ::imm<sup>434</sup>/IRO1<br/>rps1::UME67 kb ur-S.t. lacZ-URA3/RPS1</i>          | This study |
| DT389 ( <i>UME66 kb UR-lacZ</i> )             | <i>ura3Δ::imm<sup>434</sup>/ura3Δ::imm<sup>434</sup> iro1Δ::imm<sup>434</sup>/IRO1<br/>rps1::UME66 kb ur-S.t. lacZ-URA3/RPS1</i>          | (3)        |
| DT433 ( <i>UME65.5 kb UR-lacZ</i> )           | <i>ura3Δ::imm<sup>434</sup>/ura3Δ::imm<sup>434</sup> iro1Δ::imm<sup>434</sup>/IRO1<br/>rps1::UME65.5 kb ur-S.t. lacZ-URA3/RPS1</i>        | This study |
| DT437 ( <i>UME65 kb UR-lacZ</i> )             | <i>ura3Δ::imm<sup>434</sup>/ura3Δ::imm<sup>434</sup> iro1Δ::imm<sup>434</sup>/IRO1<br/>rps1::UME65 kb ur-S.t. lacZ-URA3/RPS1</i>          | This study |
| DT469<br>( <i>UME64.9 kb - 7 kb UR-lacZ</i> ) | <i>ura3Δ::imm<sup>434</sup>/ura3Δ::imm<sup>434</sup> iro1Δ::imm<sup>434</sup>/IRO1<br/>rps1::UME64.9 kb - 7 kb ur-S.t. lacZ-URA3/RPS1</i> | This study |
| DT472<br>( <i>UME64.9 kb - 6 kb UR-lacZ</i> ) | <i>ura3Δ::imm<sup>434</sup>/ura3Δ::imm<sup>434</sup> iro1Δ::imm<sup>434</sup>/IRO1<br/>rps1::UME64.9 kb - 6 kb ur-S.t. lacZ-URA3/RPS1</i> | This study |
| DT461<br>( <i>UME64 kb - 6 kb UR-lacZ</i> )   | <i>ura3Δ::imm<sup>434</sup>/ura3Δ::imm<sup>434</sup> iro1Δ::imm<sup>434</sup>/IRO1<br/>rps1::UME64 kb - 6 kb ur-S.t. lacZ-URA3/RPS1</i>   | This study |
| DT457<br>( <i>UME63 kb - 6 kb UR-lacZ</i> )   | <i>ura3Δ::imm<sup>434</sup>/ura3Δ::imm<sup>434</sup> iro1Δ::imm<sup>434</sup>/IRO1<br/>rps1::UME63 kb - 6 kb ur-S.t. lacZ-URA3/RPS1</i>   | This study |
| DT13 ( <i>NRG12.9 kb UR-lacZ</i> )            | <i>ura3Δ::imm<sup>434</sup>/ura3Δ::imm<sup>434</sup> iro1Δ::imm<sup>434</sup>/IRO1<br/>rps1::NRG12.9 kb ur-S.t. lacZ-URA3/RPS1</i>        | This study |
| DT1 ( <i>NRG12.1 kb UR-lacZ</i> )             | <i>ura3Δ::imm<sup>434</sup>/ura3Δ::imm<sup>434</sup> iro1Δ::imm<sup>434</sup>/IRO1<br/>rps1::NRG12.1 kb ur-S.t. lacZ-URA3/RPS1</i>        | This study |

|                                                                    |                                                                                                                                                                                                  |            |
|--------------------------------------------------------------------|--------------------------------------------------------------------------------------------------------------------------------------------------------------------------------------------------|------------|
| DT98 ( <i>NRG1</i> <sub>902 bp</sub> <i>UR-lacZ</i> )              | <i>ura3Δ::imm</i> <sup>434</sup> / <i>ura3Δ::imm</i> <sup>434</sup> <i>iro1Δ::imm</i> <sup>434</sup> / <i>IRO1</i><br><i>rps1::NRG1</i> <sub>902 bp</sub> <i>ur-S.t. lacZ-URA3/RPS1</i>          | This study |
| DT94 ( <i>NRG1</i> <sub>570 bp</sub> <i>UR-lacZ</i> )              | <i>ura3Δ::imm</i> <sup>434</sup> / <i>ura3Δ::imm</i> <sup>434</sup> <i>iro1Δ::imm</i> <sup>434</sup> / <i>IRO1</i><br><i>rps1::NRG1</i> <sub>570 bp</sub> <i>ur-S.t. lacZ-URA3/RPS1</i>          | This study |
| DT142 ( <i>NRG1</i> <sub>362 bp</sub> <i>UR-lacZ</i> )             | <i>ura3Δ::imm</i> <sup>434</sup> / <i>ura3Δ::imm</i> <sup>434</sup> <i>iro1Δ::imm</i> <sup>434</sup> / <i>IRO1</i><br><i>rps1::NRG1</i> <sub>362 bp</sub> <i>ur-S.t. lacZ-URA3/RPS1</i>          | This study |
| DT146 ( <i>NRG1</i> <sub>145 bp</sub> <i>UR-lacZ</i> )             | <i>ura3Δ::imm</i> <sup>434</sup> / <i>ura3Δ::imm</i> <sup>434</sup> <i>iro1Δ::imm</i> <sup>434</sup> / <i>IRO1</i><br><i>rps1::NRG1</i> <sub>145 bp</sub> <i>ur-S.t. lacZ-URA3/RPS1</i>          | This study |
| DT158 ( <i>NRG1</i> <sub>122 bp</sub> <i>UR-lacZ</i> )             | <i>ura3Δ::imm</i> <sup>434</sup> / <i>ura3Δ::imm</i> <sup>434</sup> <i>iro1Δ::imm</i> <sup>434</sup> / <i>IRO1</i><br><i>rps1::NRG1</i> <sub>122 bp</sub> <i>ur-S.t. lacZ-URA3/RPS1</i>          | This study |
| DT155 ( <i>NRG1</i> <sub>74 bp</sub> <i>UR-lacZ</i> )              | <i>ura3Δ::imm</i> <sup>434</sup> / <i>ura3Δ::imm</i> <sup>434</sup> <i>iro1Δ::imm</i> <sup>434</sup> / <i>IRO1</i><br><i>rps1::NRG1</i> <sub>74 bp</sub> <i>ur-S.t. lacZ-URA3/RPS1</i>           | This study |
| DT150 ( <i>NRG1</i> <sub>50 bp</sub> <i>UR-lacZ</i> )              | <i>ura3Δ::imm</i> <sup>434</sup> / <i>ura3Δ::imm</i> <sup>434</sup> <i>iro1Δ::imm</i> <sup>434</sup> / <i>IRO1</i><br><i>rps1::NRG1</i> <sub>50 bp</sub> <i>ur-S.t. lacZ-URA3/RPS1</i>           | This study |
| DT370<br>( <i>NRG1</i> <sub>45 bp - 2.9 kb</sub> <i>UR-lacZ</i> )  | <i>ura3Δ::imm</i> <sup>434</sup> / <i>ura3Δ::imm</i> <sup>434</sup> <i>iro1Δ::imm</i> <sup>434</sup> / <i>IRO1</i><br><i>rps1::NRG1</i> <sub>45 bp - 2.9 kb</sub> <i>ur-S.t. lacZ-URA3/RPS1</i>  | This study |
| DT374<br>( <i>NRG1</i> <sub>342 bp - 2.9 kb</sub> <i>UR-lacZ</i> ) | <i>ura3Δ::imm</i> <sup>434</sup> / <i>ura3Δ::imm</i> <sup>434</sup> <i>iro1Δ::imm</i> <sup>434</sup> / <i>IRO1</i><br><i>rps1::NRG1</i> <sub>342 bp - 2.9 kb</sub> <i>ur-S.t. lacZ-URA3/RPS1</i> | This study |
| DT362<br>( <i>NRG1</i> <sub>556 bp - 2.9 kb</sub> <i>UR-lacZ</i> ) | <i>ura3Δ::imm</i> <sup>434</sup> / <i>ura3Δ::imm</i> <sup>434</sup> <i>iro1Δ::imm</i> <sup>434</sup> / <i>IRO1</i><br><i>rps1::NRG1</i> <sub>556 bp - 2.9 kb</sub> <i>ur-S.t. lacZ-URA3/RPS1</i> | This study |
| DT366<br>( <i>NRG1</i> <sub>883 bp - 2.9 kb</sub> <i>UR-lacZ</i> ) | <i>ura3Δ::imm</i> <sup>434</sup> / <i>ura3Δ::imm</i> <sup>434</sup> <i>iro1Δ::imm</i> <sup>434</sup> / <i>IRO1</i><br><i>rps1::NRG1</i> <sub>883 bp - 2.9 kb</sub> <i>ur-S.t. lacZ-URA3/RPS1</i> | This study |
| DT378<br>( <i>NRG1</i> <sub>1.9 kb - 2.9 kb</sub> <i>UR-lacZ</i> ) | <i>ura3Δ::imm</i> <sup>434</sup> / <i>ura3Δ::imm</i> <sup>434</sup> <i>iro1Δ::imm</i> <sup>434</sup> / <i>IRO1</i><br><i>rps1::NRG1</i> <sub>1.9 kb - 2.9 kb</sub> <i>ur-S.t. lacZ-URA3/RPS1</i> | This study |
| DT572<br>( <i>NRG1</i> <sub>883 bp - 1.5 kb</sub> <i>UR-lacZ</i> ) | <i>ura3Δ::imm</i> <sup>434</sup> / <i>ura3Δ::imm</i> <sup>434</sup> <i>iro1Δ::imm</i> <sup>434</sup> / <i>IRO1</i><br><i>rps1::NRG1</i> <sub>883 bp - 1.5 kb</sub> <i>ur-S.t. lacZ-URA3/RPS1</i> | This study |
| DT576<br>( <i>NRG1</i> <sub>883 bp - 2.1 kb</sub> <i>UR-lacZ</i> ) | <i>ura3Δ::imm</i> <sup>434</sup> / <i>ura3Δ::imm</i> <sup>434</sup> <i>iro1Δ::imm</i> <sup>434</sup> / <i>IRO1</i><br><i>rps1::NRG1</i> <sub>883 bp - 2.1 kb</sub> <i>ur-S.t. lacZ-URA3/RPS1</i> | This study |

|                                                                      |                                                                                                                                                                                 |            |
|----------------------------------------------------------------------|---------------------------------------------------------------------------------------------------------------------------------------------------------------------------------|------------|
| DT564<br>( <i>NRG1</i> <sub>883 bp – 2.5 kb UR</sub> – <i>lacZ</i> ) | <i>ura3Δ::imm<sup>434</sup>/ura3Δ::imm<sup>434</sup> iro1Δ::imm<sup>434</sup>/IRO1</i><br><i>rps1::NRG1</i> <sub>883 bp – 2.5 kb ur</sub> – <i>S.t. lacZ</i> – <i>URA3/RPS1</i> | This study |
| DT568<br>( <i>NRG1</i> <sub>2.5 kb – 2.9 kb UR</sub> – <i>lacZ</i> ) | <i>ura3Δ::imm<sup>434</sup>/ura3Δ::imm<sup>434</sup> iro1Δ::imm<sup>434</sup>/IRO1</i><br><i>rps1::NRG1</i> <sub>2.5 kb – 2.9 kb ur</sub> – <i>S.t. lacZ</i> – <i>URA3/RPS1</i> | This study |

---

UR = upstream region.

S.t. = *Streptococcus thermophilus*

## References

1. Gillum AM, Tsay EY, Kirsch DR (1984) Isolation of the *Candida albicans* gene for orotidine-5'-phosphate decarboxylase by complementation of *S. cerevisiae ura3* and *E. coli pyrF* mutations. *Mol Gen Genet* 198:179-82.
2. Fonzi WA, Irwin MY (1993) Isogenic strain construction and gene mapping in *Candida albicans*. *Genetics* 134:717-28.
3. Childers DS, Mundodi V, Banerjee M, Kadosh D (2014) A 5' UTR-mediated translational efficiency mechanism inhibits the *Candida albicans* morphological transition. *Mol Microbiol* 92:570-85.
