# Supplementary material for: Filament Condition-Specific Response Elements Control the Expression of NRG1 and UME6, Key Transcriptional Regulators of Morphology and Virulence in Candida albicans
Source: PubMed Central journal article supplement (PMC4374957; doi:10.1371/journal.pone.0122775), 2015-03-26
Supplement: pone.0122775.s002.pdf [file pone.0122775.s002.pdf]

**Table S2****Primers used in this study**

| #  | Primer Name | Sequence                                           | Description                                                      |
|----|-------------|----------------------------------------------------|------------------------------------------------------------------|
| 1  | DTO13       | catgtcaagtctcgagGCATAATGATTGTTTGATTCTTA<br>ATGAAAC | 3' <i>NRG1</i> 2.9 kb promoter primer for cloning into placbasal |
| 2  | DTO33       | catgtgcaattgtactgcagCTTGCAACATTGTGTAGTTG<br>C      | 5' <i>NRG1</i> 2.9 kb promoter primer for cloning into placbasal |
| 3  | DTO228      | agtactgaactgcagCAAAACCCCAATTGCTTGGC                | 5' <i>NRG1</i> 2.5 kb promoter primer for cloning into placbasal |
| 4  | DTO30       | catgtgcaattgtactgcagCACAATAGCATACTATGCA<br>GGC     | 5' <i>NRG1</i> 2.1 kb promoter primer for cloning into placbasal |
| 5  | DTO229      | agtactgaactgcagGAGATGCACTTGGTGGTATAACC             | 5' <i>NRG1</i> 1.5 kb promoter primer for cloning into placbasal |
| 6  | DTO83       | agtactgaactgcagGCACATAGCCATGCATTAGCC               | 5' <i>NRG1</i> 902 bp promoter primer for cloning into placbasal |
| 7  | DTO84       | agtactgaactgcagGCTAGCAATGAACCAAACGG                | 5' <i>NRG1</i> 570 bp promoter primer for cloning into placbasal |
| 8  | DTO154      | agtactgaactgcagCGTCCAGGTTACTATTTTCC                | 5' <i>NRG1</i> 362 bp promoter primer for cloning into placbasal |
| 9  | DTO182      | agtactgaactgcagCATTGTTCAAGTATCTTCC                 | 5' <i>NRG1</i> 122 bp promoter primer for cloning into placbasal |
| 10 | DTO181      | agtactgaactgcagCAATAAAACATCGTTATCC                 | 5' <i>NRG1</i> 74 bp promoter primer for cloning into placbasal  |
| 11 | DTO156      | agtactgaactgcagCATCTCAAATTTTCCCTGC                 | 5' <i>NRG1</i> 50 bp promoter primer for cloning into placbasal  |
| 12 | DTO230      | agtactgaactgcagGATGAGAAACAGGATAACG                 | 3' <i>NRG1</i> 45 bp promoter primer for cloning into            |

|    |         |                                                                    |                                                                                             |
|----|---------|--------------------------------------------------------------------|---------------------------------------------------------------------------------------------|
|    |         |                                                                    | placbasal                                                                                   |
| 13 | DTO237  | agtactgaactcgagGGAAAATAGTAACCTGGACG                                | 3' <i>NRG1</i> 342 bp promoter primer for cloning into placbasal                            |
| 14 | DTO233  | agtactgaactcgagGGTTCATTGCTAGCTTGTTAGG                              | 3' <i>NRG1</i> 556 bp promoter primer for cloning into placbasal                            |
| 15 | DTO234  | agtactgaactcgagCTAATGCATGGCTATGTGCC                                | 3' <i>NRG1</i> 883 bp promoter primer for cloning into placbasal                            |
| 16 | DTO235  | agtactgaactcgagGACCACCTCAAGCCTTGG                                  | 3' <i>NRG1</i> 1.9 kb promoter primer for cloning into placbasal                            |
| 17 | DTO250* | agtactgaactgcagcatgcTTATACAGTGGATTA<br>AATAAACTAATTGGAAGTAAATTGAGG | 3' <i>UME6</i> promoter downstream primer for cloning into placbasal                        |
| 18 | DTO90*  | CTGTAAAGTTGTTGTGGTAGG                                              | 3' <i>UME6</i> promoter primer downstream of native HindIII site for cloning into placbasal |
| 19 | DTO89*  | GGTCCAGTCGACCAAGAACAATCCATTCTCG                                    | 5' <i>UME6</i> promoter primer upstream of native HindIII site for cloning into placbasal   |
| 20 | DTO243* | agtactgaactgcagcatgcTTATACAGTGGATTA<br>AATAAACTAATTGGAAGTAAATTGAGG | 5' 6.0 kb <i>UME6</i> promoter upstream primer for cloning into placbasal                   |
| 21 | DTO255  | agtactgaactgcagGAGGCAAATGGCAAGCACC                                 | 5' 7.0 kb <i>UME6</i> promoter upstream primer for cloning into placbasal                   |
| 22 | DTO110  | CAACATTATCACCTAGACCC                                               | 3' <i>UME6</i> promoter primer downstream of native XhoI site for cloning into placbasal    |
| 23 | DTO123  | GGTTACCAAAACATATCTCG                                               | 5' <i>UME6</i> promoter primer upstream of native XhoI site for cloning into placbasal      |
| 24 | DTO254  | agtactgaactgcagGTTGAAATGCACATATCGG                                 | 5' 5.5 kb <i>UME6</i> promoter upstream primer for                                          |

|    |         |                                         |                                                                                                       |
|----|---------|-----------------------------------------|-------------------------------------------------------------------------------------------------------|
|    |         |                                         | cloning into placbasal                                                                                |
| 25 | DTO93   | GCAACTCCCGGGAAATTCTA                    | 3' <i>UME6</i> promoter primer downstream of native HindIII and SmaI sites for cloning into placbasal |
| 26 | DTO51   | caatcgattctgcagGATATGTCTTTGTGTTGC       | 5' 5.0 kb <i>UME6</i> promoter upstream primer for cloning into placbasal                             |
| 27 | DTO252  | agtactgaactgcaggcatgcCCTTACTTTTCTAGTTCC | 3' 3.0 kb <i>UME6</i> promoter downstream primer for cloning into placbasal                           |
| 28 | DTO251  | agtactgaactgcaggcatgcGAATGAAGTTGGAGTGGC | 3' 4.0 kb <i>UME6</i> promoter downstream primer for cloning into placbasal                           |
| 29 | DTO260  | agtactgaagcatgcCATGCAGCAAGTAATTTGC      | 3' 4.9 kb <i>UME6</i> promoter downstream primer for cloning into placbasal                           |
| 30 | DTO169* | CGTCTTTGCAGATCGTACCC                    | 5' <i>lacZ</i> primer for qRT-PCR analysis                                                            |
| 31 | DTO170* | CTGGGAATGTTGCTTCTTCG                    | 3' <i>lacZ</i> primer for RT-qPCR analysis                                                            |
| 32 | DTO85*  | TTGCTCCAGAAGAACATCCAG                   | 5' <i>ACT1</i> primer for RT-qPCR analysis                                                            |
| 33 | DTO86*  | AGTAACACCATCACCAGAATCC                  | 3' <i>ACT1</i> primer for RT-qPCR analysis                                                            |
| 34 | DTO155  | agtactgaactgcagCAATTTGCTTTACAAGAGAACC   | 5' <i>NRG1</i> 145 bp promoter primer for cloning into placbasal                                      |
| 35 | DTO270  | agtactgaactcgagGTGTTTGTCTTAGATTGCG      | 3' <i>NRG1</i> 2.5 kb promoter primer for cloning into placbasal                                      |

---

Note: Lowercase bases indicate flanking sequences within primers that contain restriction sites for cloning.

\*previously described in Childers DS, Mundodi V, Banerjee M, Kadosh D (2014) A 5' UTR-mediated translational efficiency mechanism inhibits the *Candida albicans* morphological transition. Mol Microbiol 92:570-85.
